# Supplementary material for: The influence of cavity configuration and irrigation activation on root canal smear removal—an in vitro study
Source: PeerJ. 2025 Jul 8;13:e19678. doi: 10.7717/peerj.19678 (PMC12248232; doi:10.7717/peerj.19678)
Supplement: Supplemental Information 1 [file peerj-13-19678-s001.xlsx]

## Sheet: Sayfa1
	(Koronal)	(Middle)	(Apical)	Mean				Sample1	Sample2	Sample3	Sample4	Sample5	Sample6	Sample7	Sample8	Sample9	Sample10	Mean
Gr1	1.87	1.77	1.81	1.81667		Gr1	Koronal	1.9	1.8	2	1.8	1.9	2	1.7	1.9	2	1.7	1.87
Gr2	1.9	1.93	1.95	1.92667			Middle	1.7	1.8	1.9	1.7	1.8	1.9	1.8	1.6	1.7	1.8	1.77
Gr3	2.29	2.25	2.36	2.3			Apical	1.8	1.8	1.7	1.8	1.9	1.9	1.8	1.7	1.9	1.8	1.81
Gr4	2.54	2.64	2.75	2.64333				Sample1	Sample2	Sample3	Sample4	Sample5	Sample6	Sample7	Sample8	Sample9	Sample10	Mean
Gr5	3.27	3.38	3.44	3.36333		Gr2	Koronal	1.9	1.8	2	1.9	1.9	1.8	1.9	1.9	2	1.9	1.9
Gr6	3.84	3.93	3.91	3.89333			Middle	1.9	2	1.9	1.8	2	1.9	2	1.9	2.1	1.8	1.93
Gr7	4.15	4.17	4.29	4.20333			Apical	1.8	2.1	1.8	2	1.9	2.1	1.9	2	1.9	2	1.95
Gr8	4.66	4.7	4.61	4.65667				Sample1	Sample2	Sample3	Sample4	Sample5	Sample6	Sample7	Sample8	Sample9	Sample10	Mean
						Gr3	Koronal	2.3	2.4	2.2	2.5	2.3	2.4	2.1	2.2	2.1	2.4	2.29
							Middle	2.2	2.4	2.3	2.1	2.5	2.3	2.1	2.2	2.3	2.1	2.25
							Apical	2.4	2.3	2.5	2.1	2.6	2.3	2.4	2.4	2.5	2.1	2.36
								Sample1	Sample2	Sample3	Sample4	Sample5	Sample6	Sample7	Sample8	Sample9	Sample10	Mean
						Gr4	Koronal	2.4	2.5	2.6	2.5	2.7	2.8	2.4	2.6	2.4	2.5	2.54
							Middle	2.6	2.6	2.8	2.7	2.5	2.6	2.8	2.9	2.4	2.5	2.64
							Apical	2.8	2.9	2.4	2.6	2.7	2.8	2.7	2.8	2.9	2.9	2.75
								Sample1	Sample2	Sample3	Sample4	Sample5	Sample6	Sample7	Sample8	Sample9	Sample10	Mean
						Gr5	Koronal	2.9	3.2	3.1	3.4	3.3	3.2	3.3	3.4	3.5	3.4	3.27
							Middle	3.2	3.1	3.2	3.4	3.5	3.1	3.5	3.6	3.7	3.5	3.38
							Apical	3.2	3.3	3.5	3.4	3.6	3.4	3.5	3.6	3.4	3.5	3.44
								Sample1	Sample2	Sample3	Sample4	Sample5	Sample6	Sample7	Sample8	Sample9	Sample10	Mean
						Gr6	Koronal	3.8	3.9	3.8	4.1	3.8	3.7	3.9	3.7	3.9	3.8	3.84
							Middle	3.9	3.8	3.7	3.9	3.8	3.9	3.9	4.1	4.2	4.1	3.93
							Apical	4.1	3.8	3.7	3.9	3.6	4.2	4.1	3.8	3.9	4	3.91
								Sample1	Sample2	Sample3	Sample4	Sample5	Sample6	Sample7	Sample8	Sample9	Sample10	Mean
						Gr7	Koronal	4.1	4	3.9	4.3	4.4	4.2	4.1	4.2	4.3	4	4.15
							Middle	3.9	4.2	4.1	4	4.2	4.3	4.4	4.1	4.3	4.2	4.17
							Apical	4.4	4.5	4.6	4.2	4.3	4.2	4.1	4.3	4.1	4.2	4.29
								Sample1	Sample2	Sample3	Sample4	Sample5	Sample6	Sample7	Sample8	Sample9	Sample10	Mean
						Gr8	Koronal	4.6	4.7	4.8	4.7	4.6	4.7	4.8	4.6	4.5	4.6	4.66
							Middle	4.7	4.8	4,,7	4.8	4.9	4.8	4.6	4.4	4.7	4.6	4.7
							Apical	4.8	4.5	4.6	4.5	4.8	4.3	4.5	4.8	4.6	4.7	4.61
